# Supplementary material for: What Does Temporal Brain Signal Complexity Reveal About Verbal Creativity?
Source: Front Behav Neurosci. 2020 Aug 27;14:146. doi: 10.3389/fnbeh.2020.00146 (PMC7481454; doi:10.3389/fnbeh.2020.00146)
Supplement: Supplementary file 2 [file Table_2.xlsx]

## Sheet: Sheet1
Model	SD	Intercept of difference score	Regression weight of the difference score onto human-rated originality scores in
			Typicalassociations	Original associations
Small- AUC	0.26	0.25	-0.18	0.2
Medium- AUC	0.62	0.85	-0.19	0.1
Large- AUC	0.26	0.33	-0.18	0.04
